# Supplementary material for: Tryptophanyl tRNA Synthetase from Human Macrophages Infected by Porphyromonas gingivalis Induces a Proinflammatory Response Associated with Atherosclerosis
Source: MDPI journal article supplement (doi:10.3390/pathogens10121648), 2021-12-20
Supplement: s1 [file s1]

**Supplementary Table S1** Primers applied for quantitative RT-PCR

| Gene symbol |           | Sequence (5'-3')          | Product size (bp) |
|-------------|-----------|---------------------------|-------------------|
| WRS         | sense     | gacaagctcgagcagatcagga    | 98                |
|             | antisense | gcgatcaagggtgcagaa        |                   |
| TNF-alpha   | sense     | ctgcctgctgcactttggag      | 132               |
|             | antisense | acatgggctacaggctgtcact    |                   |
| IL-6        | sense     | gccagagctgtgcagatgag      | 112               |
|             | antisense | tcagcaggctggcatttg        |                   |
| IL-8        | sense     | gtgcagaggggttgaggagaagttt | 179               |
|             | antisense | accaggaatctgtattgcactctgg |                   |
| CXCL12      | sense     | gagccaacgtcaagcatctcaa    | 108               |
|             | antisense | ttagcttcgggtcaatgcacac    |                   |
| CCL2        | sense     | cttctgtgcctgctgctcata     | 166               |
|             | antisense | ctttgggacacttgctgctg      |                   |
| ICAM-1      | sense     | tcacggagctcccagtctctaa    | 128               |
|             | antisense | aaaggcaggttgccaatga       |                   |
| VCAM-1      | sense     | cgaaggcccagttgaagga       | 141               |
|             | antisense | gagcacgagaagctcaggagaaa   |                   |
| LDLR        | sense     | agacagtgcagcctccgtcag     | 139               |
|             | antisense | cgcatttacgtgctccgaaac     |                   |
| MSR1        | sense     | ttctgtctcaaaccctggctgtaa  | 142               |
|             | antisense | cagacatcccaaacaggctgataa  |                   |
| LOX-1       | sense     | acaagatgaagcctgcgaat      | 213               |
|             | antisense | gctgagtaagggttcgcttgg     |                   |
| CD36        | sense     | aaagtcactgcgacatgattaatgg | 131               |
|             | antisense | aacgtcggattcaatacagcatag  |                   |
